# Supplementary material
Source: ML conference proceedings conference paper supplement (https://openreview.net/forum?id=keAPCON4jHC)
Supplement: supplementary_material [file attachment]

## 463 A Extra Algorithm Details

### 464 A.1 Proof of Uncertainty Set Regularized Robust Bellman Equation

465 The proof is as follows:

$$\begin{aligned}
Q^\pi(s, a) &= r(s, a) + \gamma \min_{w \in \Omega_w} \int_{s'} P(s'|s, a; w) V^\pi(s') ds' \\
&= r(s, a) + \gamma \int_{s'} P(s'|s, a; \bar{w}) V^\pi(s') ds' + \gamma \min_{w \in \Omega_w} \int_{s'} (w - \bar{w})^T \nabla_w P(s'|s, a; \bar{w}) V^\pi(s') ds' \\
&= r(s, a) + \gamma \int_{s'} P(s'|s, a; \bar{w}) V^\pi(s') ds' - \gamma \left[ \max_{\tilde{w}} \int_{s'} -\tilde{w}^T \nabla_w P(s'|s, a; \bar{w}) V^\pi(s') ds' - \delta_{\Omega_{\tilde{w}}}(\tilde{w}) \right] \\
&= r(s, a) + \gamma \int_{s'} P(s'|s, a; \bar{w}) V^\pi(s') ds' - \gamma \int_{s'} \delta_{\Omega_{\tilde{w}}}^* [-\nabla_w P(s'|s, a; \bar{w}) V^\pi(s')] ds'
\end{aligned} \tag{6}$$

466 The second line utilizes the first-order Taylor Expansion at  $\bar{w}$ . The third line reformulates the mini-  
467 mization on  $w$  to maximization on  $\tilde{w}$  and adds an indicator function as a hard constraint on  $\tilde{w}$ . The  
468 last line directly follows the definition of convex conjugate function.

### 469 A.2 Convergence of Robust Policy Evaluation

470 We now prove that the Bellman operator with an extra regularizer term as the *policy evaluation* stage  
471 can converge to the robust action value function given some specific conditions.

472 Since  $V^\pi(s) = \int_a \pi(a|s) Q^\pi(s, a) da$ , we define the equivalent operator with respect to  $Q^\pi$  to the  
473 one proposed in this paper as  $T$  such that

$$\begin{aligned}
TQ^\pi(s, a) &= r(s, a) + \gamma \int_{s'} P(s'|s, a; \bar{w}) \int_{a'} Q^\pi(s', a') da' ds' - \alpha \int_{s'} \|\nabla_w P(s'|s, a; \bar{w}) \int_{a'} Q^\pi(s', a') da'\|_2 ds' \\
&= r(s, a) + \gamma \underbrace{\int_{s'} P(s'|s, a; \bar{w}) V^\pi(s') ds' - \alpha \int_{s'} \|\nabla_w P(s'|s, a; \bar{w}) V^\pi(s')\|_2 ds'}_{\text{The operator proposed in this paper.}}
\end{aligned} \tag{7}$$

474 To ease the derivation, we will not expand the term  $V^\pi$  as the form of  $Q^\pi$  at the beginning in the  
475 following procedures.

$$\begin{aligned}
\|TQ_1^\pi - TQ_2^\pi\|_\infty &= \max_{s, a} \left| r(s, a) + \gamma \int_{s'} P(s'|s, a; \bar{w}) V_1^\pi(s') ds' - \alpha \int_{s'} \|\nabla_w P(s'|s, a; \bar{w}) V_1^\pi(s')\|_2 ds' \right. \\
&\quad \left. - r(s, a) - \gamma \int_{s'} P(s'|s, a; \bar{w}) V_2^\pi(s') ds' + \alpha \int_{s'} \|\nabla_w P(s'|s, a; \bar{w}) V_2^\pi(s')\|_2 ds' \right| \\
&= \max_{s, a} \left| \gamma \int_{s'} P(s'|s, a; \bar{w}) [V_1^\pi(s') - V_2^\pi(s')] ds' + \right. \\
&\quad \left. \alpha \int_{s'} [\|\nabla_w P(s'|s, a; \bar{w}) V_2^\pi(s')\|_2 - \|\nabla_w P(s'|s, a; \bar{w}) V_1^\pi(s')\|_2] ds' \right| \\
&\leq \gamma \underbrace{\max_{s, a} \left| \int_{s'} P(s'|s, a; \bar{w}) [V_1^\pi(s') - V_2^\pi(s')] ds' \right|}_{\text{Partition 1.}} + \\
&\quad \underbrace{\alpha \max_{s, a} \left| \int_{s'} [\|\nabla_w P(s'|s, a; \bar{w}) V_2^\pi(s')\|_2 - \|\nabla_w P(s'|s, a; \bar{w}) V_1^\pi(s')\|_2] ds' \right|}_{\text{Partition 2.}}
\end{aligned}$$

476 Since Partition 1 is a conventional Bellman operator, following the contraction mapping property  
 477 we can directly write the inequality such that

$$\gamma \max_{s,a} \left| \int_{s'} P(s'|s, a; \bar{w}) [V_1^\pi(s') - V_2^\pi(s')] ds' \right| \leq \gamma \|V_1^\pi(s') - V_2^\pi(s')\|_\infty. \quad (8)$$

478 Next, we will process Partition 2. The details are as follows:

$$\begin{aligned} & \alpha \max_{s,a} \left| \int_{s'} \left[ \|\nabla_w P(s'|s, a; \bar{w}) V_2^\pi(s')\|_2 - \|\nabla_w P(s'|s, a; \bar{w}) V_1^\pi(s')\|_2 \right] ds' \right| \\ & \leq \alpha \max_{s,a} \left| \int_{s'} \left\| \nabla_w P(s'|s, a; \bar{w}) [V_2^\pi(s') - V_1^\pi(s')] \right\|_2 ds' \right| \\ & \leq \alpha \max_{s,a} \left| \int_{s'} \|\nabla_w P(s'|s, a; \bar{w})\|_2 |V_2^\pi(s') - V_1^\pi(s')| ds' \right| \\ & \leq \alpha \max_{s,a} \left| \max_s |V_2^\pi(s') - V_1^\pi(s')| \int_{s'} \|\nabla_w P(s'|s, a; \bar{w})\|_2 ds' \right| \\ & \leq \underbrace{\alpha \max_{s,a} \left| \int_{s'} \|\nabla_w P(s'|s, a; \bar{w})\|_2 ds' \right|}_{:=\delta} \max_{s'} |V_1^\pi(s') - V_2^\pi(s')| \\ & = \delta \|V_1^\pi - V_2^\pi\|_\infty. \end{aligned} \quad (9)$$

479 Combining the results of Eq.8 and Eq.9 and expanding the term  $V^\pi$ , we can directly get that

$$\begin{aligned} \|TQ_1^\pi - TQ_2^\pi\|_\infty & \leq (\gamma + \delta) \|V_1^\pi - V_2^\pi\|_\infty \\ & \leq (\gamma + \delta) \max_{s'} |V_1^\pi(s') - V_2^\pi(s')| \\ & \leq (\gamma + \delta) \max_{s',a'} |Q_1^\pi(s', a') - Q_2^\pi(s', a')| \\ & \leq (\gamma + \delta) \|Q_1^\pi - Q_2^\pi\|_\infty \end{aligned}$$

480 To enable  $T$  to be a contraction mapping in order to converge to the exact robust Q-values, we have  
 481 to let  $0 \leq \gamma + \delta \leq 1$ . In more details, the norm of the gradient of transition function with respect  
 482 to the uncertainty set (i.e.,  $\|\nabla_w P(s'|s, a; \bar{w})\|_2$  inside  $\delta$ ) is critical to the convergence of robust Q-  
 483 values under some robust policy. Given the above conditions, the robust value function will finally  
 484 converge.

### 485 A.3 Algorithm on Incorporating Uncertainty Set Regularizer into Soft Actor Critic

486 The proposed Uncertainty Set Regularizer method is flexible to be plugged into any existing RL  
 487 frameworks as introduced in Section 3.2. Here, we include a specific implementation on Soft Actor  
 488 Critic algorithm, see Algorithm 1.

### 489 A.4 Algorithm on Generation of Adversarial Uncertainty Set

490 This is the pseudo-code to generate the adversarial uncertainty set introduced in the paper.

## 491 B Extra Experimental Setups

### 492 B.1 RWRL Benchmarks

493 In this paper, we conduct experiments on six tasks: *cartpole\_balance*, *cartpole\_swingup*,  
 494 *walker\_stand*, *walker\_walk*, *quadruped\_walk*, *quadruped\_run*. All tasks involve a domain and a  
 495 movement. For example, *cartpole\_balance* task represents the balance movement on cartpole do-  
 496 main. In this paper, we consider 3 domains with 2 movements each.

497 The 3 domains are cartpole, walker and quadruped respectively:

---

**Algorithm 1** Uncertainty Set Regularized Robust Soft Actor Critic

---

```
1: Input: initial State  $s$ , action value  $Q(s, a; \theta)$ 's parameters  $\theta_1, \theta_2$ , policy  $\pi(a|s; \phi)$ 's parameters  $\phi$ , replay buffer  $\mathcal{D} = \emptyset$ , transition nominal parameters  $\bar{w}$ , value target update rate  $\rho$ 
2: Set target value parameters  $\theta_{tar,1} \leftarrow \theta_1, \theta_{tar,2} \leftarrow \theta_2$ 
3: repeat
4:   Execute  $a \sim \pi(a|s; \phi)$  in the environment
5:   Observe reward  $r$  and next State  $s'$ 
6:    $\mathcal{D} \leftarrow \mathcal{D} \cup \{s, a, r, s'\}$ 
7:    $s \leftarrow s'$ 
8:   for each gradient step do
9:     Randomly sample a batch transitions,  $\mathcal{B} = \{s, a, r, s'\}$  from  $\mathcal{D}$ 
10:    Construct adversarial uncertainty set  $\Omega_{\bar{w}}$  as introduced in Section 3.3 (for adversarial uncertainty set only)
11:    Compute robust value target  $y(s, a, r, s', \bar{w})$  by calculating the RHS of Equation 4
12:    Update action State value parameters  $\theta_i$  for  $i \in \{1, 2\}$  by minimizing mean squared loss to the target:
13:       $\nabla_{\theta_i} \frac{1}{|\mathcal{B}|} \sum_{(s,a,r,s') \in \mathcal{B}} (Q(s, a; \theta_i) - y(s, a, r, s', \bar{w}))^2 \quad \text{for } i = 1, 2$ 
14:    Update policy parameters  $\phi$  by policy gradient:
15:       $\nabla_{\phi} \frac{1}{|\mathcal{B}|} \sum_{(s,a,r,s') \in \mathcal{B}} (\min_{i=1,2} Q(s, \tilde{a}; \theta_i) - \alpha \log \pi(\tilde{a}|s; \phi))$ 
16:    where  $\tilde{a}$  is sampled from  $\pi(a|s; \phi)$  and differentiable w.r.t.  $\phi$ 
17:    Update target value parameters:
18:       $\theta_{tar,i} \leftarrow (1 - \rho)\theta_{tar,i} + \rho\theta_i \quad \text{for } i = 1, 2$ 
19:   end for
20: until convergence
```

---

---

**Algorithm 2** Generation of Adversarial Uncertainty Set

---

```
1: Input: current state  $s$ , current action  $a$ , value function  $V(s; \theta)$ , next state distribution  $P(\cdot|s, a; \bar{w}) = \mathcal{N}(\mu(s, a; \bar{w}), \Sigma(s, a; \bar{w}))$ 
2: do
3:   Sample  $\sigma \sim \mathcal{N}(0, I)$  and calculate next state  $s' = \mu(s, a; \bar{w}) + \Sigma(s, a; \bar{w})\sigma$  (the reparameterization trick to sample  $s' \sim P(\cdot|s, a; \bar{w})$ );
4:   Forward pass to calculate the next state value  $V(s'; \theta)$ ;
5:   Backward pass to compute the derivative  $g(\bar{w}) = \nabla_{\bar{w}} V(s'; \theta) = \frac{\partial V(s'; \theta)}{\partial s'} \frac{\partial \mu(s, a; \bar{w}) + \Sigma(s, a; \bar{w})\sigma}{\partial \bar{w}}$ ;
6:   Normalize the derivative by  $d(\bar{w}) = g(\bar{w}) / [\sum_i g(\bar{w})_i^2]^{0.5}$ ;
7:   Generate the adversarial uncertainty set  $\Omega_w = \{\bar{w} + \alpha \bar{w} : \|\bar{w}/d(\bar{w})\|_2 \leq 1\}$ .
8: done
```

---

- 498 • **Cartpole** has an unactuated pole based on a cart. One can apply a one-direction force  
499 to balance the pole. For *cartpole\_balance* task, the pole starts near the upright while in  
500 *cartpole\_swingup* task the pole starts pointing down.
- 501 • **Walker** is a planar walker to be controlled in 6 dimensions. The *walker\_stand* task re-  
502 quires an upright torso and some minimal torso height. The *walker\_walk* task encourages a  
503 forward velocity.
- 504 • **Quadruped** is a generic quadruped with a more complex state and action space than cart-  
505 pole and walker. The *quadruped\_walk* and *quadruped\_run* tasks encourage a different level  
506 of forward speed.

507 For a detailed description of these tasks, please refer DM\_CONTROL [45]. For each task, we follow  
508 the RWRL's setup by selecting 4 environmental variables and perturbing them during the testing  
509 phase. The perturbed variables and their value ranges can be found in Table 2. We also report the  
510 nominal values of these perturbed variables to indicate the differences between training and testing  
511 environments. Notably, all tasks are run for a maximum of 1000 steps and the max return is 1000.

Table 2: Tasks in RWRL benchmark and the perturbed variables.

| Task Name                                          | Observation Dimension | Action Dimension | Perturbed Variables                                               | Perturbed Range                                          | Nominal Value              |
|----------------------------------------------------|-----------------------|------------------|-------------------------------------------------------------------|----------------------------------------------------------|----------------------------|
| <i>cartpole_balance</i><br><i>cartpole_swingup</i> | 5                     | 1                | pole_length<br>pole_mass<br>joint_damping<br>slider_damping       | [0.3, 3.0]<br>[0.1, 10.0]<br>[2e-6, 2e-1]<br>[5e-4, 3.0] | 1.0<br>0.1<br>2e-6<br>5e-4 |
| <i>walker_stand</i><br><i>walker_walk</i>          | 24                    | 6                | tigh_length<br>torso_length<br>joint_damping<br>contact_friction  | [0.1, 0.7]<br>[0.1, 0.7]<br>[0.1, 10.0]<br>[0.01, 2.0]   | 0.225<br>0.3<br>0.1<br>0.7 |
| <i>quadruped_walk</i><br><i>quadruped_run</i>      | 78                    | 12               | shin_length<br>torso_density<br>joint_damping<br>contact_friction | [0.25, 2.0]<br>[500, 10000]<br>[10, 150]<br>[0.1, 4.5]   | 0.25<br>1000<br>30<br>1.5  |

## B.2 Practical Implementations of *Robust-AUC*

To calculate *Robust-AUC* in RWRL experiments, each agent is trained with 5 random seeds. During the testing phase, for each environmental variable  $P$ , we uniformly sample 20 perturbed values  $v$  in the range of  $[v_{min}, v_{max}]$ . For each value  $v$ , the environment variable  $P$  is first modified to value  $v$  and the agent is tested for 100 episodes (20 episodes per seed). We then select the 10%-quantile<sup>1</sup> as the return  $r$  at value  $v$ . By doing so we roughly have an approximated curve  $C(v, r)$  and can calculate *Robust-AUC* defined previously. We also report the area between 5%-quantile and 15%-quantile as the statistical uncertainty of the reported *Robust-AUC*.

## B.3 Model Structure

The model structure for all experimental baselines is based on the Yarats and Kostrikov [46]’s implementation of Soft Actor Critic (SAC) [27] algorithm. The actor network is a 3-layer feed-forward network with 1024 hidden units and outputs the Gaussian distribution of action. The critic network adopts the double-Q structure [47] and also has 3 hidden layers with 1024 hidden units on each layer, but only outputs a real number as the action State value.

## B.4 Hyperparameters

To compare all algorithms fairly, we set all hyperparameters equally except the robust method and its coefficient. All algorithms are trained with Adam optimizer [28]. The full hyperparameters are shown in Table 3. For regularizer coefficients of all robust update methods, please see Table 4. We can see that this parameter is pretty robust and do not need very handy work to finetune. All experiments are carried out on NVIDIA GeForce RTX 2080 Ti and Pytorch 1.10.1.

## B.5 Extra Setups of Sim-to-real Task

We use the Unitree A1 robot [34] and the Bullet simulator [35] as the platform for sim-to-real transfer. The Unitree A1 is a quadruped robot with 12 motors (3 motors per leg). The Bullet simulator is a popular simulation tool specially designed for robotics.

It is well known that there is a non-negligible difference between simulators and real robots due to: (1) the simulator possesses a simplified dynamics model and suffers from accumulated error [33] and (2) there are significant differences between simulators and real hardware in robot’s parameters, such as a quadruped example in Table 5. Therefore, training policies in simulation and applying them to real robots (sim-to-real) is a challenging task for robotics.

<sup>1</sup>10%-quantile as a worst-case performance evaluates the robustness of RL algorithms more reasonably than common metrics.

Table 3: Hyperparameters of Robust RL algorithms.

| HYPERPARAMETERS                  | VALUE   | DESCRIPTION                                                       |
|----------------------------------|---------|-------------------------------------------------------------------|
| BATCH SIZE                       | 1024    | THE NUMBER OF TRANSITIONS FOR EACH UPDATE                         |
| DISCOUNT FACTOR $\gamma$         | 0.99    | THE IMPORTANCE OF FUTURE REWARDS                                  |
| REPLAY BUFFER SIZE               | 1e6     | THE MAXIMUM NUMBER OF TRANSITIONS STORED IN MEMORY                |
| EPISODE LENGTH                   | 1e3     | THE MAXIMUM TIME STEPS PER EPISODE                                |
| MAX TRAINING STEP                | 1e6     | THE NUMBER OF TRAINING STEPS                                      |
| RANDOM STEPS                     | 5000    | THE NUMBER OF RANDOMLY ACTING STEPS AT THE BEGINNING              |
| ACTOR LEARNING RATE              | 1e-4    | THE LEARNING RATE FOR ACTOR NETWORK                               |
| ACTOR UPDATE FREQUENCY           | 1       | THE FREQUENCY FOR UPDATING ACTOR NETWORK                          |
| ACTOR LOG STD BOUNDS             | [-5, 2] | THE OUTPUT BOUND OF LOG STANDARD DEVIATION                        |
| CRITIC LEARNING RATE             | 1e-4    | THE LEARNING RATE FOR CRITIC NETWORK                              |
| CRITIC TARGET UPDATE FREQUENCY   | 2       | THE FREQUENCY FOR UPDATING CRITIC TARGET NETWORK                  |
| CRITIC TARGET UPDATE COEFFICIENT | 0.005   | THE UPDATE COEFFICIENT OF CRITIC TARGET NETWORK FOR SOFT LEARNING |
| INIT TEMPERATURE                 | 0.1     | INITIAL TEMPERATURE OF ACTOR’S OUTPUT FOR EXPLORATION             |
| TEMPERATURE LEARNING RATE        | 1e-4    | THE LEARNING RATE FOR UPDATING THE POLICY ENTROPY                 |
| SAMPLE SIZE                      | 1       | THE SAMPLE SIZE TO APPROXIMATE THE ROBUST REGULARIZOR             |

Table 4: Regularization coefficients of Robust RL algorithms.

| Task Name               | Algorithms |        |        |        |        |         |
|-------------------------|------------|--------|--------|--------|--------|---------|
|                         | None-Reg   | L1-Reg | L2-Reg | L1-USR | L2-USR | Adv-USR |
| <i>cartpole_balance</i> | -          | 1e-5   | 1e-4   | 5e-5   | 1e-4   | 1e-5    |
| <i>cartpole_swingup</i> | -          | 1e-5   | 1e-4   | 1e-4   | 1e-4   | 1e-4    |
| <i>walker_stand</i>     | -          | 1e-4   | 1e-4   | 5e-5   | 1e-4   | 1e-4    |
| <i>walker_walk</i>      | -          | 1e-4   | 1e-4   | 1e-4   | 1e-4   | 5e-4    |
| <i>quadruped_walk</i>   | -          | 1e-5   | 1e-4   | 1e-4   | 1e-4   | 5e-4    |
| <i>quadruped_run</i>    | -          | 1e-4   | 1e-4   | 5e-5   | 1e-4   | 7e-5    |

Specifically, we perform 2 sim-to-real tasks: standing and locomotion following previous work [36]. The detailed description of the experiment is as follows:

**Observation** The observation contains the following features of 3 steps: motor angles (12 dim), root orientation (4 dim, roll, pitch, roll velocity, pitch velocity), and previous actions (12 dim). So the observation space is 84 dimensions.

**Action** All 12 motors can be controlled in the position control mode, which is further converted to torque with an internal PD controller. The action space for each leg is defined as  $[p - o, p + o]$ . The specific values for different parts (hip, upper leg, knee) in the standing task are  $p = [0.00, 1.6, -1.8]$ ,  $o = [0.8, 2.6, 0.8]$ . The values in the locomotion task are  $p = [0.05, 0.7, -1.4]$ ,  $o = [0.2, 0.4, 0.4]$ .

**Reward** For the standing task, the reward consists of 3 parts:  $r(s, a) = 0.2 * r_{\text{HEIGHT}} + 0.6 * r_{\text{POSE}} + 0.2 * r_{\text{VEL}}$ .  $r_{\text{HEIGHT}} = 1 - |z - 0.2587| / 0.2587$  is rewarded for approaching the standing position on the z-axis.  $r_{\text{POSE}} = \exp\{-0.6 * \sum |m_{\text{target}} - m|\}$  is for correct motor positions.  $r_{\text{VEL}}$  is punished for positive velocity (standing should be still in the end). For the locomotion task, the reward function is inspired by Smith et al. [48].  $r(s, a) = r_v(s, a) - 0.1 * v_{\text{YAW}}^2$ .  $v_{\text{YAW}}$  is angular yaw velocity and  $r_v(s, a) = 1$  for  $v_x \in [0.5, 1.0]$ ,  $= 0$  for  $v_x \geq 2.0$  and  $= 1 - |v_x - 0.5|$  otherwise, is rewarded for velocity in x-axis.

**Simulation Training** We first train SAC agents with and without *Adv-USR* in simulations. Each step simulates 0.033 seconds so that the control frequency is 33 Hz. Agents are trained for  $1e^6$  steps in the standing task and  $2e^6$  steps in the locomotion task. The model structures and hyperparameters are the same as in RWRL experiments and can be referred to Appendix B.3 and B.4. The regularizer coefficients for *Adv-USR* are  $1e^{-3}$  and  $1e^{-4}$  for two tasks.

**Real Robot Evaluation** After training, we directly deploy the learned policies on real robots. Since all sensors are internal on robots, there are no external sensors required. The control frequency is set as 33 Hz. We run each policy 50 episodes with 1000 steps and report the 10%-quantile of the final return and 5% – 15%-quantile as the error bar in Figure 3.

Table 5: Unitree A1’s Parameters in Simulation and Real Robot.

| Parameters                               | Simulation   | Real Robot                     |
|------------------------------------------|--------------|--------------------------------|
| Mass (kg)                                | 12           | [10, 14]                       |
| Center of Mass (cm)                      | 0            | [-0.2, 0.2]                    |
| Motor Strength ( $\times$ default value) | 1.0          | [0.8, 1.2]                     |
| Motor Friction (Nms/rad)                 | 1.0          | [0.8, 1.2]                     |
| Sensor Latency (ms)                      | 0            | [0, 40]                        |
| Initial position (m)                     | (0, 0, 0.25) | ([-1, 1], [-1, 1], [0.2, 0.3]) |

## C Extra Experimental Results

### C.1 Constant Perturbation on System Parameters

Extra experimental results for task *cartpole\_balance*, *walker\_walk* and *quadruped\_run* can be found in Table 6. We can observe similar results as in the main paper that both *L2-USR* and *L1-USR* can outperform the default version under some certain perturbations (e.g. *L1-USR* in *cartpole\_balance* for pole\_mass, *L2-USR* in *walker\_walk* for thigh\_length), while *Adv-USR* achieves the best average rank among all perturbed scenarios, showing the best zero-shot generalization performance in continuous control tasks. Notably, *L2-Reg* in *walker\_walk* and *L1-Reg* in *quadruped\_run* also achieve a competitive robust performance compared with *Adv-USR*. A possible reason is that, for environments with high-dimensional state and action spaces, some of them are redundant and direct regularization on value function’s parameters is effective to perform dimensionality reduction and thus learns a generalized policy.

Table 6: *Robust-AUC* of all algorithms and their uncertainties on RWRL benchmark.

| Task Name               | Variables        | Algorithms            |                       |                       |                       |                       |                      |
|-------------------------|------------------|-----------------------|-----------------------|-----------------------|-----------------------|-----------------------|----------------------|
|                         |                  | <i>None-Reg</i>       | <i>L1-Reg</i>         | <i>L2-Reg</i>         | <i>L1-USR</i>         | <i>L2-USR</i>         | <i>Adv-USR</i>       |
| <i>cartpole_balance</i> | pole_length      | 981.45 (5.92)         | <b>989.85 (3.74)</b>  | 989.33 (8.32)         | 798.07 (22.93)        | 944.89 (23.33)        | 959.66 (26.58)       |
|                         | pole_mass        | 623.88 (28.64)        | 605.35 (55.60)        | 607.79 (23.18)        | <b>632.54 (14.74)</b> | 588.13 (38.33)        | 627.00 (22.90)       |
|                         | joint_damping    | 970.83 (21.89)        | 978.97 (9.95)         | 982.71 (15.24)        | <b>985.57 (10.01)</b> | 978.62 (17.52)        | 982.43 (130.03)      |
|                         | slider_damping   | 999.44 (0.26)         | 999.30 (0.43)         | 999.34 (0.57)         | 999.45 (0.31)         | 999.49 (0.48)         | <b>999.55 (0.32)</b> |
|                         | average rank     | 4.00                  | 4.00                  | 3.25                  | 2.75                  | 4.50                  | <b>2.50</b>          |
| <i>walker_walk</i>      | thigh_length     | 315.64 (37.24)        | 237.90 (25.04)        | 345.12 (40.30)        | 316.61 (37.86)        | <b>350.01 (34.37)</b> | 318.88 (53.73)       |
|                         | torso_length     | 498.01 (54.04)        | 300.39 (114.06)       | 533.96 (47.73)        | <b>550.44 (50.83)</b> | 543.39 (42.52)        | 543.91 (54.36)       |
|                         | joint_damping    | 364.70 (50.33)        | 283.19 (30.18)        | <b>420.23 (51.84)</b> | 357.39 (56.04)        | 356.22 (49.74)        | 368.35 (64.76)       |
|                         | contact_friction | 885.01 (27.47)        | 714.94 (27.15)        | <b>907.13 (18.94)</b> | 897.65 (23.49)        | 900.58 (21.46)        | 902.03 (24.68)       |
|                         | average          | 4.50                  | 6.00                  | <b>2.00</b>           | 3.25                  | 3.00                  | 2.25                 |
| <i>quadruped_run</i>    | shin_length      | 204.14 (91.36)        | <b>280.11 (61.49)</b> | 168.95 (38.19)        | 246.43 (117.07)       | 214.18 (56.06)        | 250.07 (79.37)       |
|                         | torso_density    | 321.24 (76.70)        | <b>417.68 (88.55)</b> | 252.37 (88.41)        | 319.43 (90.79)        | 225.32 (80.49)        | 383.14 (67.34)       |
|                         | joint_damping    | 367.05 (139.61)       | 641.08 (19.12)        | 687.42 (12.85)        | 324.38 (14.73)        | <b>692.02 (6.98)</b>  | 664.25 (19.35)       |
|                         | contact_friction | <b>654.43 (57.94)</b> | 614.21 (76.60)        | 473.58 (61.72)        | 632.64 (95.18)        | 624.32 (124.39)       | 537.19 (76.22)       |
|                         | average rank     | 3.75                  | <b>3.00</b>           | 5.00                  | <b>3.00</b>           | 3.25                  | <b>3.00</b>          |

### C.2 Constant Perturbation on Multiple System Parameters

In real-world scenarios, there would be uncertainties in all system parameters. We provide the following additional experimental results to show the robustness when all parameters are perturbed simultaneously. The specific environmental setup is that all 4 parameters are perturbed simultaneously during testing. The perturbation intensity grows from 0 to 1. 0 resembles training environments without perturbations and 1 represents the allowed maximum perturbed values in Table 2. We adopt the same metric *Robust-AUC* and report it in the following table. All methods become less robust due to the increasing difficulty of perturbations, but *Adv-USR* still outperforms others.

Table 7: *Robust-AUC* of all algorithms and their uncertainties on RWRL benchmark.

| Task Name               | Algorithms      |                |                |                |                |                       |
|-------------------------|-----------------|----------------|----------------|----------------|----------------|-----------------------|
|                         | <i>None-Reg</i> | <i>L1-Reg</i>  | <i>L2-Reg</i>  | <i>L1-USR</i>  | <i>L2-USR</i>  | <i>Adv-USR</i>        |
| <i>cartpole_swingup</i> | 867.42 (0.27)   | 856.87 (0.52)  | 866.99 (0.23)  | 867.61 (0.44)  | 867.45 (0.26)  | <b>881.36 (0.21)</b>  |
| <i>walker_stand</i>     | 254.04 (32.91)  | 235.36 (25.29) | 254.64 (35.01) | 262.57 (25.02) | 263.35 (24.85) | <b>266.97 (7.75)</b>  |
| <i>quadruped_walk</i>   | 522.98 (34.93)  | 524.24 (85.03) | 525.51 (24.58) | 525.14 (85.68) | 506.17 (54.92) | <b>534.61 (18.25)</b> |

### C.3 Noisy Perturbation on System Parameters

One may also be interested in the noisy perturbation setup where system parameters keep changing at every time step. This setup extends the Robust RL framework where the perturbation is fixed throughout the whole episode. The specific experimental setup noisy perturbation is as follows: the environmental parameter starts from the nominal value and follows a zero-mean Gaussian random walk at each time step. The nominal value and the standard deviation of the Gaussian random walk are recorded in Table 8. The experimental result on *quadruped\_walk* is shown in Figure 4. In this experiment, *L1-Reg* achieves the best robustness, while our method *Adv-USR* achieves Top-2 performance in 3 out of 4 perturbations. While *L1-Reg* performs less effectively in the case of fixed perturbation, it implies that different regularizers do have different impacts on these two types of perturbations. For noisy perturbation, environmental parameters walk randomly around the nominal value and reach the extreme value less often, which requires a less conservative robust RL algorithm. Our algorithm *Adv-USR*, originally designed for fixed perturbation problem, achieves good but not the best performance, which leads to an interesting future research direction on the trade-off between robustness and conservativeness.

Table 8: The perturbed variables for the noise perturbation experiment.

| Task Name             | Perturbed Variables | Start Value | Step Standard Deviation | Value Range  |
|-----------------------|---------------------|-------------|-------------------------|--------------|
| <i>quadruped_walk</i> | shin_length         | 0.25        | 0.1                     | [0.25, 2.0]  |
|                       | torso_density       | 1000        | 500                     | [500, 10000] |
|                       | joint_damping       | 30          | 10                      | [10, 150]    |
|                       | contact_friction    | 1.5         | 0.5                     | [0.1, 4.5]   |

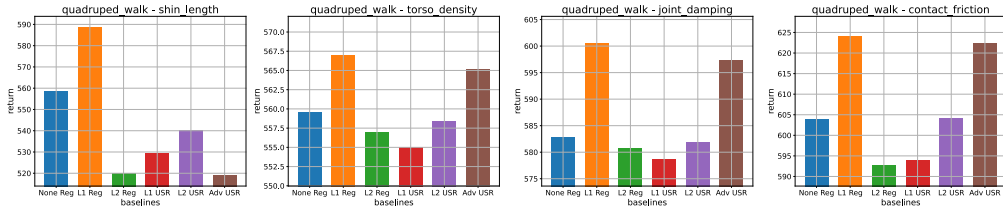

Figure 4: The parameter-return bar graph of all algorithms. All bars represent 10%-quantile value of episodic return under noisy environmental parameters.

### C.4 Computational Cost of All Algorithms

We report the average computation time (in milliseconds) for a single value update of all algorithms in Table 9. We notice that the computation of all algorithms increases as the environment’s complexity grows, and *L1-Reg*, *L1-Reg*, *Adv-USR*’s complexities are acceptable compared with other baselines ( $\times 1 \sim 1.25$  time cost). The computation only becomes a problem when applying *USR* methods to dynamics with millions of parameters (common in model-based RL [44]). To tackle this issue, we can identify important parameters to reduce computation costs, as stated in Section 7.



Table 9: The computational cost (in milliseconds) for each value update of Robust RL algorithms.

| Task Name               | Algorithms      |               |               |               |               |                |
|-------------------------|-----------------|---------------|---------------|---------------|---------------|----------------|
|                         | <i>None-Reg</i> | <i>L1-Reg</i> | <i>L2-Reg</i> | <i>L1-USR</i> | <i>L2-USR</i> | <i>Adv-USR</i> |
| <i>cartpole_balance</i> |                 |               |               |               |               |                |
| <i>cartpole_swingup</i> | 14.72 ± 1.57    | 16.48 ± 1.68  | 17.05 ± 1.63  | 17.62 ± 1.49  | 22.48 ± 3.21  | 22.48 ± 3.21   |
| <i>walker_stand</i>     |                 |               |               |               |               |                |
| <i>walker_walk</i>      | 15.71 ± 1.23    | 18.89 ± 1.58  | 17.52 ± 1.92  | 18.06 ± 1.80  | 18.39 ± 1.90  | 23.16 ± 1.72   |
| <i>quadruped_walk</i>   |                 |               |               |               |               |                |
| <i>quadruped_run</i>    | 15.93 ± 1.68    | 19.47 ± 1.47  | 19.56 ± 1.67  | 20.79 ± 4.20  | 19.13 ± 1.98  | 25.23 ± 2.14   |

Theoretically, the additional computational cost largely depends on the norm term  $\|\nabla_w P(s'|s, a; \bar{w}) V^\pi(s')\|_2$  in Equation 5, time complexity is  $O(W)$  ( $W$  is the number of parameters).

## D Extra Related Work

**Action Perturbation.** Early works in Robust RL concentrated on action space perturbations. Pinto et al. [42] first proposed an adversarial agent perturbing the action of the principle agent, training both alternately in a mini-max style. Tessler et al. [49] later performed action perturbations with probability  $\alpha$  to simulate abrupt interruptions in the real world. Afterwards, Kamalaruban et al. [50] analyzed this mini-max problem from a game-theoretic perspective and claimed that an adversary with mixed strategy converges to a mixed Nash Equilibrium. Similarly, Vinitisky et al. [51] involved multiple adversarial agents to augment the robustness, which can also be explained in the view of a mixed strategy.

**State Perturbation.** State perturbation can lead to the change of state from  $s$  to  $s_p$ , and thus might worsen an agent’s policy  $\pi(a|s)$  [52]. Zhang et al. [53], Oikarinen et al. [54] both assume an  $L_p$ -norm uncertainty set on the state space (inspired by the idea of adversarial attacks widely used in computer vision [55]) and propose an auxiliary loss to encourage learning to resist such attacks. It is worth noting that state perturbation is a special case of transition perturbation, which can be covered by the framework proposed in this paper, as further explained in Appendix E.

**Reward Perturbation.** The robustness-regularization duality has been widely studied, especially when considering reward perturbations [21, 22, 23]. One reason is that the policy regularizer is closely related to a perturbation on the reward function without the need for a rectangular uncertainty assumption. However, it restricts the scope of these works as reward perturbation, since it can be shown to be a particular case of transition perturbation by augmenting the reward value in the state [22]. Besides, the majority of works focus on the analysis of regularization to robustness, which can only analyze the effect of existing regularizers instead of deriving novel regularizers for robustness as in the work we present here.

**Bayesian RL.** One commonality between Bayesian RL and Robust RL is that they both store uncertainties over the environmental parameter (posterior distribution  $q(w)$  in Bayesian RL and uncertainty set  $\Omega_w$  in Robust RL). Uncertainties learned in Bayesian RL can benefit Robust RL in two ways: (1) Robust RL can define an uncertainty set  $\Omega_w = \{w : q(w) > \alpha\}$  to learn a robust policy that can tolerate model errors, which is attractive for offline RL and model-based RL; (2) A soft robust objective with respect to the distribution  $q(w)$  can ease the conservative behaviours caused by the worst-case scenario [18].

**Adaptive RL** Adaptive RL (often referred as Meta RL [56]) is another popular technique to deal with the perturbations in environments parallel to Robust RL introduced in this paper. The main difference between Robust RL and Adaptive RL is whether policy parameters are allowed to change when environmental parameters vary. Robust RL is a zero-shot learning technique aiming to learn one single robust policy that can be applied to various perturbed environments. Adaptive RL is a few-shot learning technique aiming to quickly change policy to adapt to the changing environments.



648 These two techniques can be combined to increase the robustness in real-world robots. One can first  
 649 use Robust RL to learn a base policy as the warm start and fine-tune the policy on certain perturbed  
 650 environments with Adaptive RL.

## 651 **E Comparison with State Perturbation**

652 State perturbation describes the uncertainties in the output space of the dynamics model, which is  
 653 a special case of transition perturbation. We illustrate how to transform the State perturbation into  
 654 transition perturbation in the following case.

655 Considering a  $L_2$  uncertainty set on the output of the dynamics model,  $\Omega_{s_p} = \{s_p | s' \sim$   
 656  $P(\cdot | s, a; \bar{w}), \|s' - s_p\| \leq 1\}$ . We can rewrite the next State distribution  $s' \sim P(\cdot | s, a; \bar{w})$  as  
 657  $s' = f(s' | s, a; \bar{w}) + \eta$ , where  $\eta$  is a random noise  $\eta \sim \mathcal{N}(0, 1)$ . Then the perturbed State can  
 658 be written as  $s_p = f(s' | s, a; \bar{w}) + \eta + \beta, \|\beta\| \leq 1$ . Viewing  $\beta$  as one additional parameter in the  
 659 dynamics model, the uncertainty set on  $\beta$  is actually  $\Omega_\beta = \{\|\beta\| \leq 1\}$ . Based on this uncertainty set  
 660 on  $\beta$ , one can further design corresponding regularizers on value function to increase the robustness  
 661 as discussed in the paper.

662 If the uncertainty set on state space is unknown, denoted as  $\Omega_\beta$ , it is still feasible to include  $\beta$  as an  
 663 additional parameter in the dynamics model. As a result, *Adv-USR* could still be used to handle this  
 664 unknown uncertainty set on  $\beta$ .
